# Supplementary material for: Ensemble learning predicts multiple sclerosis disease course in the SUMMIT study
Source: PubMed Central journal article supplement (PMC7567781; doi:10.1038/s41746-020-00338-8), 2020-10-16
Supplement: 41746_2020_338_MOESM1_ESM.pdf [file 41746_2020_338_MOESM1_ESM.pdf]

## Supplementary Information

### SUMMIT Consortium Members

Mark Anderson<sup>3,4</sup>, Jalayne Arias<sup>2,4</sup>, Rohit Bakshi<sup>3,4</sup>, Sergio Baranzini<sup>2,4</sup>, Antje Bischof<sup>2,4</sup>, Riley Bove<sup>2,4</sup>, Tanuja Chitnis<sup>3,4</sup>, Bruce Cree<sup>2,4</sup>, Bonnie Glanz<sup>3,4</sup>, Stephen Hauser<sup>2,4</sup>, Brian Healy<sup>3,4</sup>, Roland Henry<sup>2,4</sup>, Jill Hollenbach<sup>2,4</sup>, Robin Lincoln<sup>2,4</sup>, Cuquita O'Shea<sup>2,4</sup>, Jorge Oksenberg<sup>2,4</sup>, Nikolaos Patsopoulos<sup>3,4</sup>, Anu Paul<sup>3,4</sup>, Mariann Polgar-Turcsanyi<sup>3,4</sup>, Francisco Quintana<sup>3,4</sup>, Adam Renschen<sup>2,4</sup>, Adam Santaniello<sup>2,4</sup>, Taylor Saraceno<sup>3,4</sup>, Howard Weiner<sup>3,4</sup>
